# Supplementary material for: Functional morphology of theAlligator mississippiensislarynx with implications for vocal production
Source: Oxford University Press journal article supplement (doi:10.1242/jeb.117101), 2015-02-06
Supplement: jeb117101_supp.pdf [file jeb117101_supp.pdf]

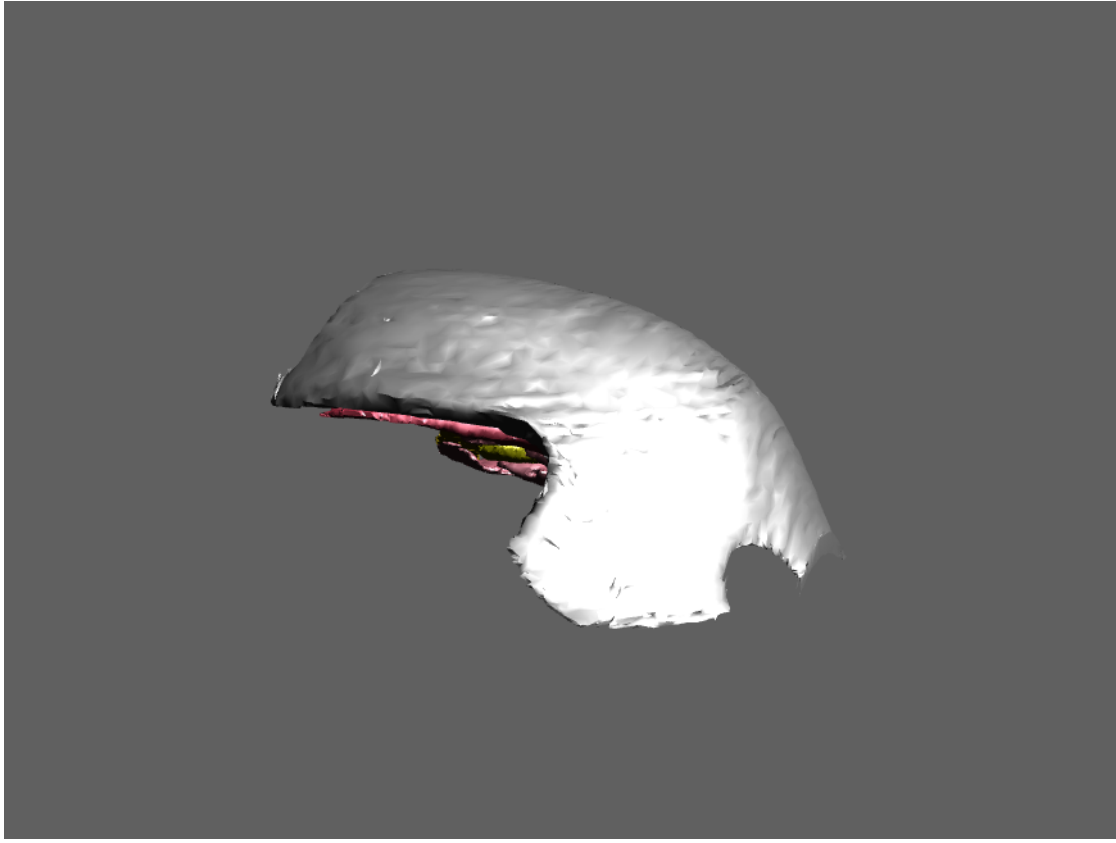

**Fig. S1.** Laryngeal cartilaginous framework and muscles of a male alligator larynx (interactive 3D PDF). This 3D PDF figure can be viewed with Adobe Acrobat Reader version 11 (<http://www.adobe.com>). Click on the figure to activate the 3D features. Use the ‘toggle model tree’ tool in Adobe Acrobat Reader to selectively show cartilages or soft tissue. This tool also provides labels for each structure.
